# Supplementary material for: Active enhancers strengthen insulation by RNA-mediated CTCF binding at chromatin domain boundaries
Source: PubMed Central journal article supplement — Genome Res. 2023 Jan;33(1):1–17. doi: 10.1101/gr.276643.122 (PMC9977152; doi:10.1101/gr.276643.122), 2023-01
Supplement: supp_gr.276643.122_Supplemental_Table_S1.pdf [file supp_gr.276643.122_Supplemental_Table_S1.pdf]

## Supplemental Table S1: Oligonucleotide sequences used in the study

### Primers used for ChIP-qPCRs

| CTCF sites | Forward Primer (5'-3')      | Reverse Primer (5'-3')     |
|------------|-----------------------------|----------------------------|
| -T2        | TAAATCTCCTGCCAGGAGG         | GGCAGGTTCCATTTACTTTGAG     |
| -T1        | GGCAGTACTGAGTTGACAC         | CCCAGGAAACTGGACCTCTAA      |
| B1         | AGCTCTCTGCACCACATTGCCACTGCC | CCAACTACCTCCGCAAGGACACC    |
| B2         | TTGAGGACATCTAGCGGCG         | GCTGCAGATTCTGGAATGAGC      |
| B3         | GTCAGGACTAGGCCATCTGAC       | TAGGTGTCCAAGTGAAGATTAAGAG  |
| +T1        | CAACTCCTCCGAGTGAAA          | ACACTGTGACCGCTCCATTC       |
| +T2        | GCATAGATGTTTGAGGGGCAAC      | TTACAGAATCTGGCTACTGCC      |
| INK4a      | TCGCCAGGAGGAGGTCTGTGATTAC   | CAGGTGGGTAGAGGGTCTGCAGC    |
| ARF        | ACCCAGGATATTCGGGACTCACTGAC  | CGTCTAGCCCAGGCTAGGAGG      |
| INK4b      | CCGTCGTCCTCTGCGGCTTG        | AGTGAGGACTCCGCGACGCGT      |
| MYC C1     | TGTTTTAAGGAACCGCTGTCC       | CTGGATTTTCTGCAAAAGCGT      |
| MYC C2     | AGGGAGGGATCGCGCTGAGT        | CGAAGCCCCCTATTCTGCTCCGGATC |
| MYC C3     | CTGCACCCTGAGAAATAGTGGTG     | AGGTCTGTCTGGCTCCACATC      |

### Primers used for qRT-PCRs

| mRNA/bRNA    | Forward Primer (5'-3')    | Reverse Primer (5'-3')   |
|--------------|---------------------------|--------------------------|
| <i>MTAP</i>  | TTGACAGGACCACTATGAGACCTC  | AGGTCCCTCGATTGTGACCATT   |
| <i>INK4a</i> | ATGGAGCCTTCGGCTGACT       | CACCAGCGTGTCCAGGAAG      |
| <i>ARF</i>   | AACATGGTGCGCAGGTCT        | CACCAGCGTGTCCAGGAAG      |
| <i>INK4b</i> | CGTTAAGTTTACGGCCAACG      | CCATCATCATGACCTGGATCG    |
| <i>DDX5</i>  | CCTACCTGTCTTGTATGAAGC     | CACTCAGTTCAAGTGACCA      |
| <i>CTCF</i>  | TACAAACACACCCACGAGAAG     | GGGTAACCGAGCATGACAA      |
| b1S          | CCACAGCAGAATAGAGCACC      | AAGTCCAGCCAGTCTCAGCA     |
| b1AS         | TGAGGCTTGTAGGAACTCAAGTTC  | AGTGGCAATGTGGTGCAGAG     |
| b2S          | ACAGAGGTCGGATGTTCTGTG     | TAAACCGCCGCTAGATGTCC     |
| b2AS         | CTCCTGAGCTCTAAGTGAATAGAGG | GGTTATCACTCACAGTCTCTTACG |
| sno RNA      | CGTGTAGAGCACCGAAAACC      | CACTCAGACCGGTTCTCTC      |
| pre c-MYC    | CTTCTCTCCGCTCGGATTC       | CCTTCTAATAAGAGTGGCCCG    |
| <i>GAPDH</i> | CGCTCTCTGCTCCTCTGTT       | CCATGGTGTCTGAGCGATGT     |
| 18SrRNA      | GTAACCCGTTGAACCCATT       | CCATCCAATCGGTAGTAGCG     |
| <i>CASC8</i> | CCTTCAGGTTTCACTCAGAAATG   | GGCAGGCAGAACTGAACAAGAT   |
| <i>MYC</i>   | GAGGAGACATGGTGAACCAGAG    | CCAGCTTCTGAGACGAGC       |
| <i>PVT1</i>  | GGATTCTTACAGCTTGGATGTCC   | TCCAGGGAGTATGGTCAGCT     |
| <i>ASAP1</i> | TGGAGAGCAGAGTGCGGGAG      | GTTGAAAGCCAGGTGGGTTTC    |
| mycS         | TCAGGGCTAACAGACGCCT       | AACCAGCAACGCATTGCCACGTA  |
| mycAS        | GCATCCTTGTCTGTGAGTAT      | TTCTTTCTCCACTCTCCCTG     |
| Chr11 bRNA   | GTTACTGATAAGGACGCGAGCT    | CAGAGTAAGCGCTCAATAAATGG  |

**shRNAs used for knockdown**

| <b>shRNA</b>            | <b>Primer sequence (5'-3')</b>                               |
|-------------------------|--------------------------------------------------------------|
| shRNA1 Boundary 1 S F   | CCGGGAGTTGTGAGACCCTCATTTCTCGAGGAAATGAGGGTCTCACAACTCTTTTTG    |
| ShRNA1 Boundary 1 S R   | AATTCAAAAAGAGTTGTGAGACCCTCATTTCTCGAGGAAATGAGGGTCTCACAACTC    |
| ShRNA2 Boundary 1 S F   | CCGGGGACCCTGAGCTGTGAATAACCTCGAGTTATTACAGCTCAGGGTCTTTTTG      |
| ShRNA2 Boundary 1 S R   | AATTCAAAAAGACCCTGAGCTGTGAATAACCTCGAGTTATTACAGCTCAGGGTCC      |
| ShRNA3 Boundary 1 S F   | CCGGGAGTCTAGCCAGGTAATTTCTCGAGAATATTACCTGGCTAGGACTCTTTTTG     |
| shRNA3 Boundary 1 S R   | AATTCAAAAAGAGTCTAGCCAGGTAATTTCTCGAGAATATTACCTGGCTAGGACTC     |
| shRNA1 Boundary 1 AS F  | CCGGCTGGCTCCGGCTGGTTTAAATCTCGAGATTTAAACCAGCCGGAGCCAGTTTTTG   |
| ShRNA1 Boundary 1 AS R  | AATTCAAAACTGGCTCCGGCTGGTTTAAATCTCGAGATTTAAACCAGCCGGAGCCAG    |
| ShRNA2 Boundary 1 AS F  | CCGGCGGCTCTGCTTTCAGCTATAACTCGAGTTATAGCTGAAAGCAGAGCCGTTTTTG   |
| ShRNA2 Boundary 1 AS R  | AATTCAAAAACGGCTCTGCTTTCAGCTATAACTCGAGTTATAGCTGAAAGCAGAGCCG   |
| ShRNA3 Boundary 1 AS F  | CCGGAGGTAAGATGTAAGCATTAACTCTCGAGATTAATGCTTACATCTTACCTTTTTTG  |
| shRNA3 Boundary 1 AS R  | AATTCAAAAAGGTAAGATGTAAGCATTAACTCTCGAGATTAATGCTTACATCTTACCT   |
| shRNA1 Boundary 2 S F   | CCGGCGCAATCCAACCTATTCAATTTCTCGAGAAATTGAATAGTTGGATTGCGTTTTTG  |
| ShRNA1 Boundary 2 S R   | AATTCAAAAACGCAATCCAACCTATTCAATTTCTCGAGAAATTGAATAGTTGGATTGCG  |
| ShRNA2 Boundary 2 S F   | CCGGGCTTCTCGAAGGAGAGTAATCTCGAGATTACTCTCCTTCAGGAAAGCTTTTTG    |
| ShRNA2 Boundary 2 S R   | AATTCAAAAAGCTTCTCGAAGGAGAGTAATCTCGAGATTACTCTCCTTCAGGAAAGC    |
| ShRNA3 Boundary 2 S F   | CCGGTAGCAATGGCAGAACCTATTTCTCGAGAAATAGTTTCTGCCATTGCTATTTTTG   |
| shRNA3 Boundary 2 S R   | AATTCAAAAATAGCAATGGCAGAACCTATTTCTCGAGAAATAGTTTCTGCCATTGCTA   |
| shRNA1 Boundary 2 AS F  | CCGGAGGAACTACATTGACTTATTTCTCGAGAAATAAGTCAATGTAGTTCTTTTTTG    |
| ShRNA1 Boundary 2 AS R  | AATTCAAAAAGGAACTACATTGACTTATTTCTCGAGAAATAAGTCAATGTAGTTCTCT   |
| ShRNA2 Boundary 2 AS F  | CCGGCGACCTCTGTAATGAAATAGCTCGAGCTATTTCAATTTACAGAGGTCGTTTTTG   |
| ShRNA2 Boundary 2 AS R  | AATTCAAAAACGACCTCTGTAATGAAATAGCTCGAGCTATTTCAATTTACAGAGGTCG   |
| ShRNA3 Boundary 2 AS F  | CCGGTGGATTGCGATTTCTGAAATCTCGAGATTTACAGAAATCGCAATCCATTTTTG    |
| shRNA3 Boundary 2 AS R  | AATTCAAAAATGGATTGCGATTTCTGAAATCTCGAGATTTACAGAAATCGCAATCCA    |
| shRNA1 Boundary mycS F  | CCGGCTAAGTCGAAGCGTAAATAAACTCGAGTTATTTACGCTTCGACTTAGTTTTTG    |
| shRNA1 Boundary mycS R  | AATTCAAAACTAAGTCGAAGCGTAAATAAACTCGAGTTATTTACGCTTCGACTTAG     |
| ShRNA2 Boundary mycS F  | CCGGGACCGCATTTCGAATAATAAACTCGAGTTTATTATTGAAATGCGGTCTTTTTG    |
| ShRNA2 Boundary mycS R  | AATTCAAAAAGACCGCATTTCGAATAATAAACTCGAGTTTATTATTGAAATGCGGTCT   |
| ShRNA3 Boundary mycS F  | CCGGGATGAGTCGAATGCCTAAATAACTCGAGTATTTAGGCATTTCGACTCATTTTTG   |
| ShRNA3 Boundary mycS R  | AATTCAAAAAGATGAGTCGAATGCCTAAATAACTCGAGTATTTAGGCATTTCGACTCATC |
| ShRNA4 Boundary mycS F  | CCGGTCTCCGGGAGGGCATTAAATCTCGAGATTTAAATGCCCTCCCGGAGATTTTTG    |
| ShRNA4 Boundary mycS R  | AATTCAAAAATCTCCGGGAGGGCATTAAATCTCGAGATTTAAATGCCCTCCCGGAGA    |
| ShRNAs5 Boundary mycS F | CCGGGCGAGGATATCTGGAAGAAATCTCGAGATTTCTCCAGATATCTTCGCTTTTTG    |
| ShRNAs5 Boundary mycS R | AATTCAAAAAGCGAGGATATCTGGAAGAAATCTCGAGATTTCTCCAGATATCTTCGCG   |
| shRNA1 Boundary mycAS F | CCGGGGAGAGCGGTTATGAATAAACTCGAGTTATTCATAACGCGCTCTCTTTTTG      |
| shRNA1 Boundary mycAS R | AATTCAAAAAGGAGAGCGGTTATGAATAAACTCGAGTTATTCATAACGCGCTCTCC     |

### Primers used for RNA IP

| Target                   | Primer sequence (5'-3')                |
|--------------------------|----------------------------------------|
| B1 S in pCDNA 3 Box B F  | AGACTGGCGGCCGCTAGGCCTCAAGGACTGCAA      |
| B1 S in pCDNA 3 Box B R  | AGACTGTCTAGACTCCTGGGAGCCAGAGAA         |
| B1 AS in pCDNA 3 Box B F | AGACTGGAATTCAGTAGGTCGCATGCAACCACA      |
| B1 AS in pCDNA 3 Box B R | AGACTGGCGGCCGCTCCTACATCAGCTGTGGCACA    |
| B2 S in pCDNA 3 Box B F  | AGACTGGAATTCGCCTCTGAGCCTGTAGAGACCAA    |
| B2 S in pCDNA 3 Box B R  | AGACTGGCGGCCGCTCTGGGTGAGGCAGTGAACAC    |
| B2 AS in pCDNA 3 Box B F | AGACTGGAATTCATCCTCCAGGACCACAGCAGT      |
| B2 AS in pCDNA 3 Box B R | AGACTGGCGGCCGCGCATAACCCTGGAGTGAGAGGTTG |
| E8 S in pCDNA 3 Box B F  | AGACTGGAATTCATGCCATATGGTGGCAATG        |
| E8 S in pCDNA 3 Box B R  | AGACTGGCGGCCGCGCATCTGTTCTTGCCTCTTCCAC  |

### gRNAs used for deletions and CRISPRi

| gRNA          | Sequence              |
|---------------|-----------------------|
| B1 DEL gRNA 1 | TTAAATTGGTGCCTTGCGG   |
| B1 DEL gRNA 2 | GTAGTGAATATTACCTGGCT  |
| B2 DEL gRNA 1 | CAGACTTCCGTAGTCCCAT   |
| B2 DEL gRNA 2 | TTGGGTAGCATCTTCATCGG  |
| MTAP gRNA 1   | AGCAGTGCGGAGACCAGGGG  |
| MTAP gRNA 2   | CTCACTTGCCGCGCGAGGAG  |
| INK4a gRNA 1  | AGCCGTTTTACACGCAGGAG  |
| INK4a gRNA 2  | GACAGGACAGTATTTGAAGC  |
| ARF gRNA 1    | ATGCGCCCCGGACTTTTCGA  |
| ARF gRNA 2    | CTGCCCCCTTAAGTGCAGAC  |
| INK4b gRNA 1  | AAAGAATTCCGTTTTTCAGCT |
| INK4b gRNA 2  | CTAGGAAGGAGAGAGTGCGC  |

### Surveyor Oligos

| Target | Forward Primer (5'-3')  | Reverse Primer (5'-3')  |
|--------|-------------------------|-------------------------|
| B1 DEL | TGGAGTGGTAGTAGTGTGGGAAG | GTACGAGGGTTCTTTTTGCTTG  |
| B2 DEL | CACAACCCCATCTCTGTAAC    | TGAAGTGAGGGGAGTAGACAAGG |

#### 4C oligos for enhancer and Promoter viewpoints

| View Point | Primer sequence (5'-3')                                                 |
|------------|-------------------------------------------------------------------------|
| Enhancer F | AATGATACGGCGACCACCGAACACTCTTCCCTACACGACGCTCTCCGATCTGGTATTCTGACTAGAAGCTT |
| Enhancer R | CAAGCAGAAGACGGCATAACGATAGTGGTGCTACAGTACCAC                              |
| Promoter F | AATGATACGGCGACCACCGAACACTCTTCCCTACACGACGCTCTCCGATCTGGAGGAGCTAGGGCAAGCTT |
| Promoter R | CAAGCAGAAGACGGCATAACGACAGATGGATAAGTAGTAGCAAG                            |
