# Supplementary material for: Active enhancers strengthen insulation by RNA-mediated CTCF binding at chromatin domain boundaries
Source: HighWire-hosted journal article supplement (doi:10.1101/gr.276643.122), 2023-01-01
Supplement: Supplemental_Table_S2.xlsx [file Supplemental_Table_S2.xlsx]

## Sheet: Sheet1
Supplemental Table S2: Datasets used in the study
Experiment	Annotation	Accession Number	References
HeLa GRO-seq	SRR1596500	GSM1518913	Andersson et al., 2014. Nat Commun.
HeLa GRO-seq	SRR1596501	GSM1518914	Andersson et al., 2014. Nat Commun.
HeLa HiC	SRR1050968	-	Burton et al., 2013. Nat Biotechnol.
HeLa HiC	SRR1050969	-	Burton et al., 2013. Nat Biotechnol.
HeLa HiC	SRR3203899	-	Rao et al., 2014. Cell
HeLa HiC	SRR3203900	-	Rao et al., 2014. Cell
HeLa HiC	SRR3203901	-	Rao et al., 2014. Cell
HeLa HiC	SRR3203902	-	Rao et al., 2014. Cell
HeLa HiC	SRR3203903	-	Rao et al., 2014. Cell
HeLa HiC	SRR3203904	-	Rao et al., 2014. Cell
HeLa HiC	SRR3203905	-	Rao et al., 2014. Cell
HeLa HiC	SRR3203906	-	Rao et al., 2014. Cell
HeLa PolII	wgEncodeSydhTfbsHelas3Pol2StdSig	GSM935395	ENCODE
HeLa CTCF	wgEncodeUwTfbsHelas3CtcfStdRawRep1	GSM749729	ENCODE
HeLa CTCF	wgEncodeUwTfbsHelas3CtcfStdRawRep2	GSM749739	ENCODE
HeLa CTCF Cut and Run	SRR8204885	GSM3477606	Skene et al., 2017. Elife
HeLa CTCF Cut and Run	SRR8204908	GSM3477629	Skene et al., 2017. Elife
HeLa CTCF Cut and Run	SRR8204909	GSM3477630	Skene et al., 2017. Elife
HeLa CTCF Cut and Run	SRR8204910	GSM3477631	Skene et al., 2017. Elife
HeLa CTCF Cut and Run	SRR8204911	GSM3477632	Skene et al., 2017. Elife
HeLa CTCF Cut and Run	SRR8204912	GSM3477633	Skene et al., 2017. Elife
HeLa CTCF Cut and Run	SRR8204913	GSM3477634	Skene et al., 2017. Elife
HeLa H3K27ac	wgEncodeBroadHistoneHelas3H3k27acStdSig	GSM733684	ENCODE
IMR90 HiC	SRR5494761	GSM2595584	Zirkel etal., 2018. Mol Cell
IMR90 PRO seq	SRR6205688	GSM2828779	Sen et al., 2019. Mol Cell
IMR90 CTCF	wgEncodeSydhTfbsImr90CtcfbIggrabSig	GSM935404	ENCODE
K562 CTCF	wgEncodeUwTfbsGm12878CtcfStdAlnRep1	GSM749690	ENCODE
K562 GROseq	SRR1552484	GSM1480325	Core et al., 2014. Nat Genet.
HeLa_GRO-Seq	SRR5109939	GSM2428725	Bouvy-Liivrand et al., 2017. Nucleic Acids Res
PRO-Seq-DMSO	SRR5799635	GSM2692352	Nilson et al., 2017.Nucleic Acids Res
Total mNET-Seq	SRR4436479	GSM2357382	Schlackow et al., 2017. Mol Cell
HeLa CAGE	SRR7641272	GSM3318223	Hirabayashi et al., 2019. Nature Genetics
HeLa CAGE	SRR7641273	GSM3318224	Hirabayashi et al., 2019. Nature Genetics
HeLa NET-CAGE	SRR7641274	GSM3318225	Hirabayashi et al., 2019. Nature Genetics
HeLa NET-CAGE	SRR7641275	GSM3318226	Hirabayashi et al., 2019. Nature Genetics
HeLa NET-CAGE	SRR7641276	GSM3318227	Hirabayashi et al., 2019. Nature Genetics
HeLa NET-CAGE	SRR7641277	GSM3318228	Hirabayashi et al., 2019. Nature Genetics
HeLa NET-CAGE	SRR7641278	GSM3318229	Hirabayashi et al., 2019. Nature Genetics
HeLa NET-CAGE	SRR7641279	GSM3318230	Hirabayashi et al., 2019. Nature Genetics
HeLa pcHiC	SRR11142931	GSM4331876	Thiecke et al., 2020. Cell Reports
HeLa pcHiC	SRR11142932	GSM4331877	Thiecke et al., 2020. Cell Reports
HeLa pcHiC	SRR11142935	GSM4331880	Thiecke et al., 2020. Cell Reports
HeLa pcHiC	SRR11142936	GSM4331881	Thiecke et al., 2020. Cell Reports
BJ.C.gro.rep1.lane1	SRR6497147	GSM2936610	Li et al. , 2018. Nucleic Acid Res
BJ.C.gro.rep1.lane2	SRR6497148	GSM2936611	Li et al. , 2018. Nucleic Acid Res
BJ.C.gro.rep2.lane1	SRR6497149	GSM2936612	Li et al. , 2018. Nucleic Acid Res
BJ.C.gro.rep2.lane2	SRR6497150	GSM2936613	Li et al. , 2018. Nucleic Acid Res
BJ.RAS.gro.rep1.lane1	SRR6497151	GSM2936614	Li et al. , 2018. Nucleic Acid Res
BJ.RAS.gro.rep1.lane2	SRR6497152	GSM2936615	Li et al. , 2018. Nucleic Acid Res
BJ.RAS.gro.rep2.lane1	SRR6497153	GSM2936616	Li et al. , 2018. Nucleic Acid Res
BJ.RAS.gro.rep2.lane2	SRR6497154	GSM2936617	Li et al. , 2018. Nucleic Acid Res
